# Supplementary material
Source: PubMed Central journal article supplement (PMC3642380)
Supplement: embor201340s1.pdf [file embor201340s1.pdf]

**A**

```

P.pastoris Atg30      1  --MFSRKQVQKRNEFSSHCNNS--N
H.polyphorma Atg30   1  MASNSVSEVANPPTPNKYKVALNELSTVSSASLLSAGSRMINQNTDLARLGLSFPFRSGN
M.quilliermondii Atg30 1  -----TANPNFY-----N
S.stipitis Atg30     1  -----MSINPEFMYTTTPYKPGSKVGNNGN-----ENGN
C.albicans Atg30    1  -----MSINPNLKLFLKI-----N
L.elongisporus Atg30 1  -----MSINPEFSLFKLHAAITITPTPTSTSLEAEASLANHTNTVDYDNDYDYDYDYN

P.pastoris Atg30      25  SLNRIHKNEITAKGVGVNARGNNSINVASHCGLLP-----RTSSILLNNS-----
H.polyphorma Atg30   61  SRGHTQNDNFFRRRASPTSAEDDDTYNIDVGGEGVDPOHRESFSGGDSSS-----
M.quilliermondii Atg30 8  -----OIGRGSRRQVATLNSSESLDANSAPR-----RENSTLSDS-----
S.stipitis Atg30     32  ENNESSSGNINNSNITKNTAKKRNRRARALGAGNOQMT-----ATSSITSDYDDIDTHE
C.albicans Atg30    15  NRRKNNNSTTMNSQQQKSKQQSQQQHQH-----KKNKYNSE-----ATSSITSDYDDIDID
L.elongisporus Atg30 54  AYDINAAGELELDQKIANNRKCKQKTSIN-KKKIKLTEITKTISILSDYDDIDPL

P.pastoris Atg30      73  -----WLFSENAEAGEYVITSSGIRITNSNHYYYNYNEDDILSSRRSS-----
H.polyphorma Atg30   116 -----WLFSEGPSE-----TKKPAEDPY-----DMLSTLEKIS-----
M.quilliermondii Atg30 49  -EASS-----WLFNPEEG-----SDILSLNGIVE-----
S.stipitis Atg30     89  -DNSS-----YLFNPKPS-----AGAGNT-----SDILSLDTSNT-----
C.albicans Atg30    71  -DDQSS-----YLFNPKSLA-----SSSRKQSQH-----SDILSFNTSNT-----
L.elongisporus Atg30 113 -GGEYSGRSTATTLYLFNFKTNS-----LSSAAMNN-----SDILSLNTSRE-----

P.pastoris Atg30      120 -IVY-----PACFYTEQPVNHWQEF-----EEDDLSLILN-----LTIIVVD
H.polyphorma Atg30   148 -TQN-----PAMPE-----SEFACQ-----EEDDLSLILN-----EESH
M.quilliermondii Atg30 70  -S-----EES-----SCPEED-----SLIEDPPEPS-----QSRLRL
S.stipitis Atg30     123 -HNVYYSPEEPEYSDEPAPADPRDVAVRDVEEPEEHDPSHYRGNSRWKRLDST
C.albicans Atg30    111 -NVEYQSPPEEPEESENSETESE-----EEEDDAQEDD-----RVSTOLE
L.elongisporus Atg30 157 -PEE-----PEEPEEPEEPEEKEE-----EEEDDAQET-----

P.pastoris Atg30      159 -DYDEED-DQDITRIDNWRKQVSELLNENLHDDDLDPINLRDKIDLQSGIENKIL
H.polyphorma Atg30   178 -INFDIPTREEDINBRIDNWRQVQVSIILKLAGD-----QSEDDDTIELLKAGIDETGS
M.quilliermondii Atg30 104 -FTQKQKPPSSRDQRTDQWRNDHC-----SELVDDN-----TASWLDENIQ
S.stipitis Atg30     183 -ITRSEPIVNNNSLNKLSHYQSS-----SEHAFDDN-----TASWLDENIQ
C.albicans Atg30    149 -HNDTEVLRNDSSEHNSNYTANVSSSH-----QSLIDRR-----TASRELDGAN
L.elongisporus Atg30 185 -----EY-----GKLSKNSSHSNIMTSRG-----EDN-----TASRNLEPEE

P.pastoris Atg30      218 -NTKPRAKKR-----KSKRASFYGDDLSE
H.polyphorma Atg30   234 -GTYRNIWLQ-----RPWDTFYGDALRK
M.quilliermondii Atg30 147 -SELSETTSTHTI-----TFEPPNTEPFYGDIDLVR
S.stipitis Atg30     228 -ETSEVEVAVESQ-----DPTNKLINOFYGDLEFK
C.albicans Atg30    197 -LLESSQESSKS-----LESKSLSEFYGDLLFK
L.elongisporus Atg30 224 -NPEEKQOQQQQOQQOQQOQEEEGSFNLSGVQSYHLRQLLDESKRLSEFYGDLLFK

P.pastoris Atg30      243 -KYSMEIILIKQIVAQLRDD-----LKVKVD-----KPSPEPIYHNTKQAPSSNSNPE
H.polyphorma Atg30   259 -SYSKEELVLRKQLLIKSGS-----LRRTVVS-----RYIKPOSSQAPITTSMAI
M.quilliermondii Atg30 178 -NMRROPIKVKTAGRAAPN-----HPEEQ-----GRLPQIDQITSLI-----RSPE
S.stipitis Atg30     259 -FPQDELPAFKENLLEIDIKLLEKNSA-----ATGAASASQSLIKLLL-NKNTETV
C.albicans Atg30    226 -VLNQELAKVKKEHRMIDINLLRQNN-----NNSHDDOLYKHLFKDKKHDIT
L.elongisporus Atg30 284 -YLNPEIACVKKEHRYIDIKLLSKNETRETTIANSPLKQILYKLLITLERNQCIA

P.pastoris Atg30      295 -ISYYSNYLTKNSQOTFNSQSTSGSLLNPNPEPIPLFKNLLYEDSNGSHQ-----
H.polyphorma Atg30   305 -ITEAYMNTAKNRDPIQ-----LNKNSQKYIEMFLKLIITSDLLQERFDDD
M.quilliermondii Atg30 224 ------GLP-----SN-----QNSYQSLIETVLEH-----BPRP
S.stipitis Atg30     316 ------DTME-----EAGFASQDYINYNTANI-----PARS-----
C.albicans Atg30    280 ------HRO-----N-----TIDYINYKRD-----PARS-----
L.elongisporus Atg30 344 -TSSSSLLQQDNPP-----MN-----EADYINYKRD-----EIN-----

P.pastoris Atg30      350 -----PETSEKEH
H.polyphorma Atg30   355 -DVTEDEGAKTNIEDGPMAPYVARSKESIISNFSGVIRIRASDGGRRRSKGLVKRNSSDNE
M.quilliermondii Atg30 250 -----RUGPATV
S.stipitis Atg30     346 -----VLVHPATE
C.albicans Atg30    304 -----PAFVABSTI
L.elongisporus Atg30 379 -----YNHNNYTNHPYMHFPHQFAEETA

P.pastoris Atg30      359 -WLNELKVNSSIT--SSNSKLEKQEI
H.polyphorma Atg30   415 -WNSPLKVNSSIT--YSTSIVG--
M.quilliermondii Atg30 257 -YSDTLAGSSSLICCG-----SWDPI
S.stipitis Atg30     354 -SDTLAGSSSLICGGVFGGSAWNDI
C.albicans Atg30    313 -SDTLAGSSSLICGGVFGGSAWNDI
L.elongisporus Atg30 402 -LSEISITRGSLLICGGVFGGSTWNDI

```

**Figure S1.** Non-conserved and non-functional AIM in Atg30. **(A)** Multiple sequence alignments of Atg30 homologs (identical residues are indicated with black boxes and similar residues with grey boxes). Sequences, accession numbers, abbreviation of organism names and methodology used for the alignments are in Materials and Methods. Red box indicates a putative AIM in Atg30. **(B)** Pexophagy assay by fluorescence microscopy analysis of methanol-induced peroxisomes labeled with BFP-SKL and Atg30-GFP.  $\phi$ :  $\Delta atg30$ ; Atg30: WT; Atg30<sup>Y330A L333A</sup>: putative AIM mutant. Vacuoles are labeled with FM4-64. Scale bar: 5  $\mu$ m.

**B**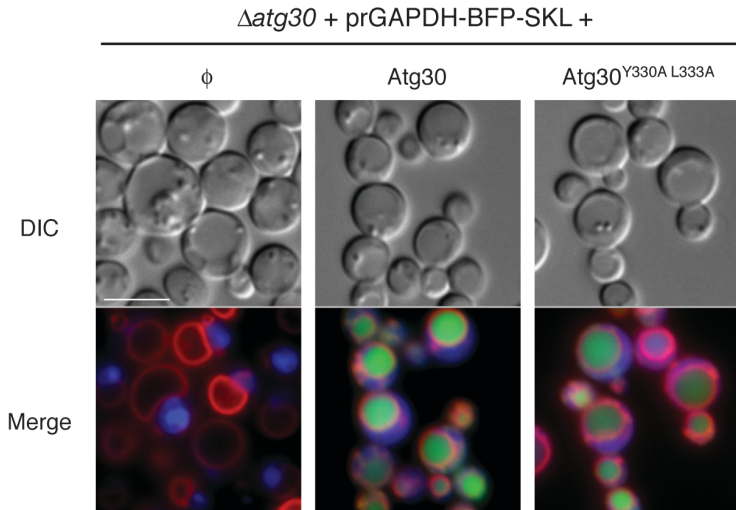

A

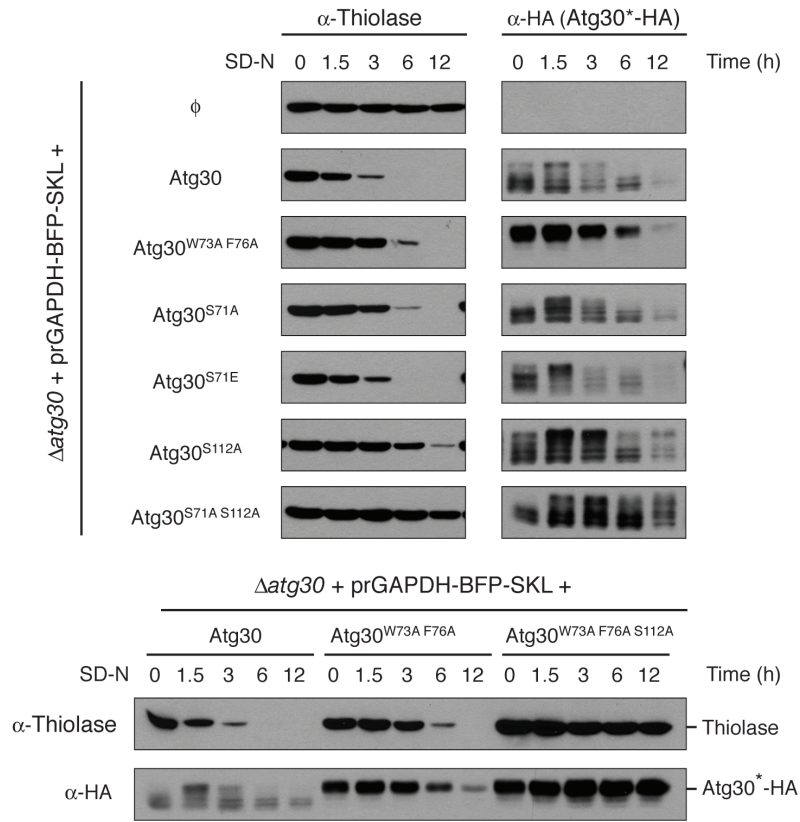

B

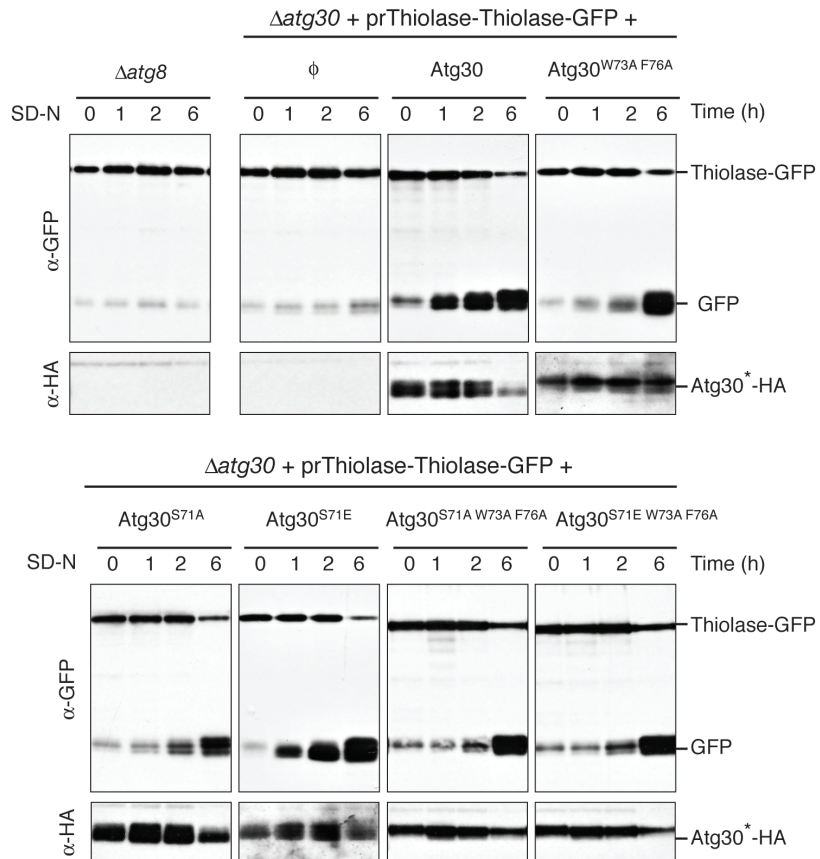

C

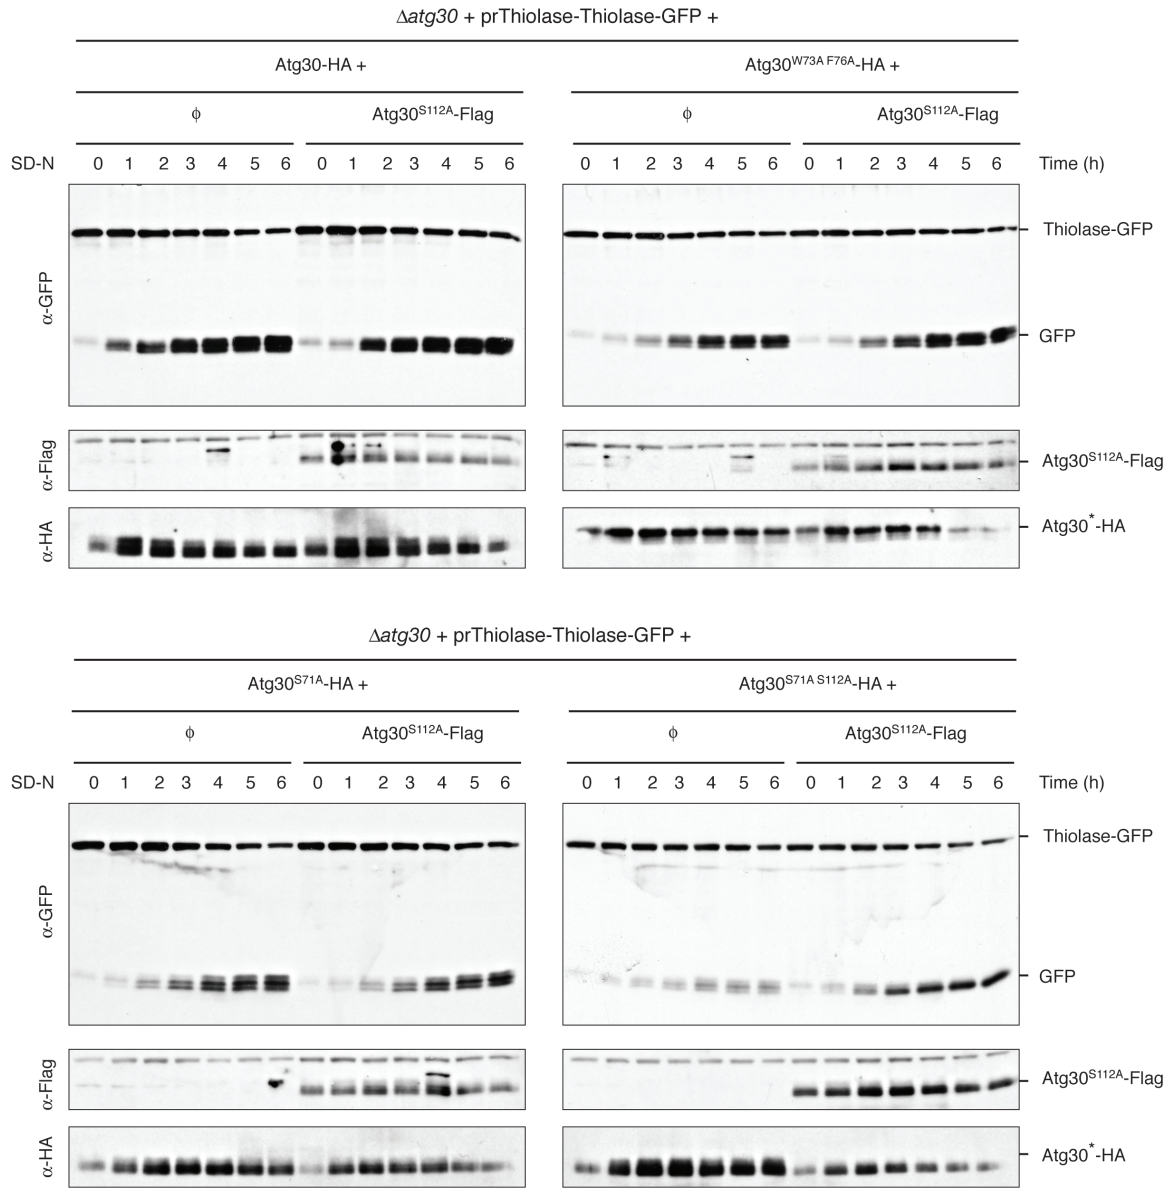

**Figure S2.** Pexophagy experiments monitored by degradation of thiolase (A) or by appearance of free GFP (B and C). Degradation of oleate-induced peroxisomes was stimulated by shifting cells to SD-N. The presence of the specified proteins was examined by immunoblotting using  $\alpha$ -Scthiolase,  $\alpha$ -GFP,  $\alpha$ -HA and/or  $\alpha$ -Flag antibody. (A) Pexophagy in  $\Delta atg30$  ( $\phi$ ), WT (Atg30) and Atg30 mutants was monitored by thiolase levels. (B and C) Pexophagy was monitored by appearance of free GFP. \*: Atg30 wild-type or mutant forms.

A

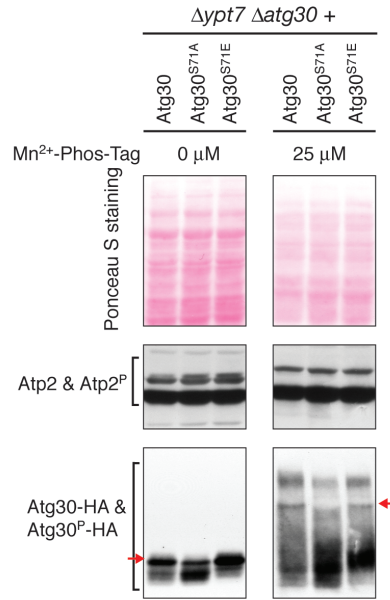

B

| Rank | Score | SPI (%) | VML | Variable sites | Sequence                                                    |
|------|-------|---------|-----|----------------|-------------------------------------------------------------|
| 1    | 10.41 | 60.7    | 1.3 | S71s           | (R) T S S I L T / D N s E W / I   L   F / S   P E N R (E) * |

C

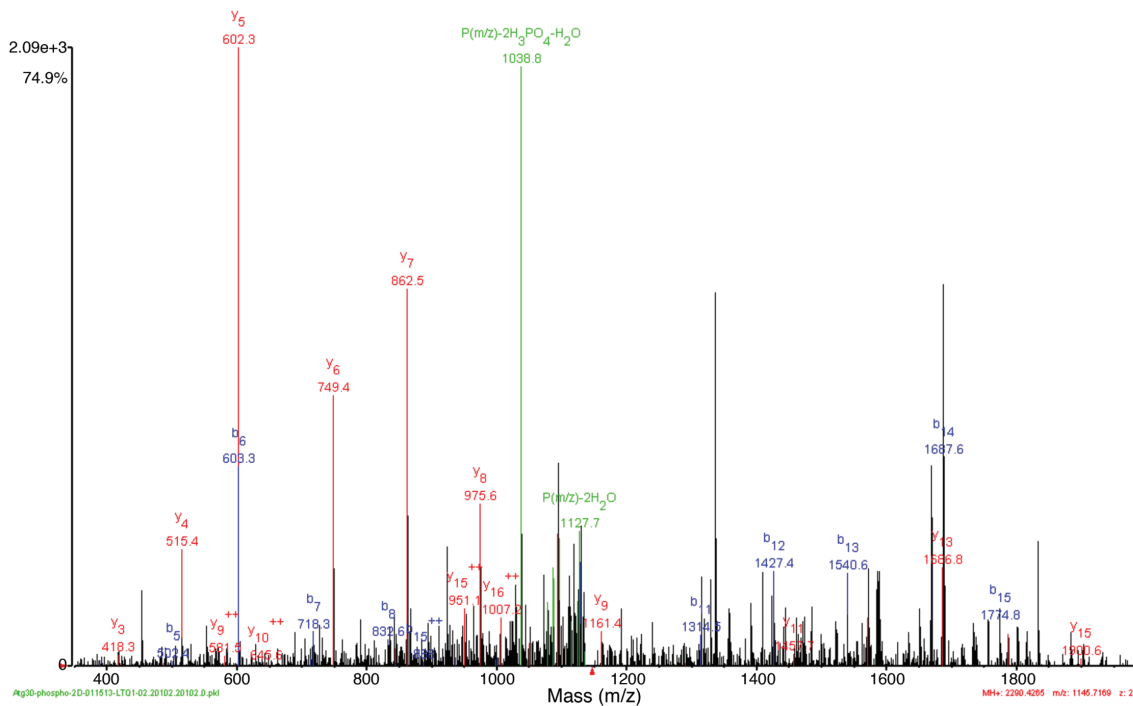

**Figure S3.** Phosphorylation of S71 in the Atg30 protein. (A) Mobility shift detection of Atg30 and Atg30 phosphomutants (Atg30<sup>S71A</sup> and Atg30<sup>S71E</sup>) proteins. Phosphorylated



molecules were separated using Phos-tag acrylamide as described in the Methods section of Supplementary information. Cells were grown in oleate medium for 15 h and shifted to SD-N for 30 min. Ponceau S staining and Atp2 were used as a loading control. Red arrow indicates a band absent in Atg30<sup>S71A</sup>. **(B)** Table containing result of Spectrum Mill search result of S71 phospho-peptide. SPI (%): Score Peak Intensity. VML: Variable Modification Localization score [1]. The site is considered localized when VML > 1.1. \*: / = y ions; | = both b and y ions. **(C)** MS2 spectra revealing the S71 phospho-peptide.

**A**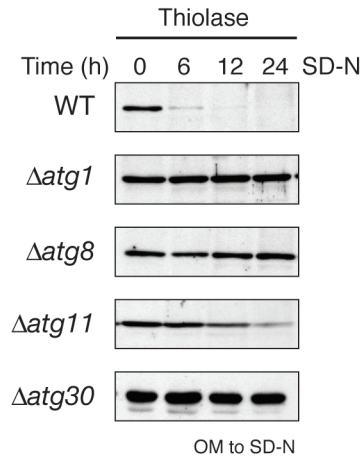**B**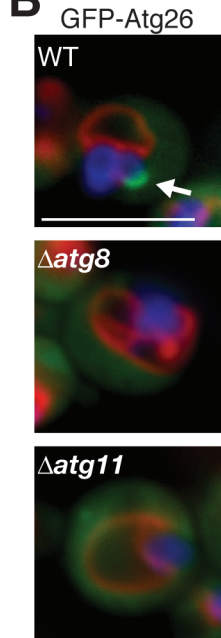

**Figure S4.** Atg8 and Atg11 are indispensable for pexophagy. (A) Pexophagy experiments of oleate-induced peroxisomes shifted to SD-N followed by degradation of thiolase. (B) Large phagophore membrane formation in WT,  $\Delta atg8$  and  $\Delta atg11$  cells monitored with GFP-Atg26 during pexophagy upon switch from methanol to SD-N [2].

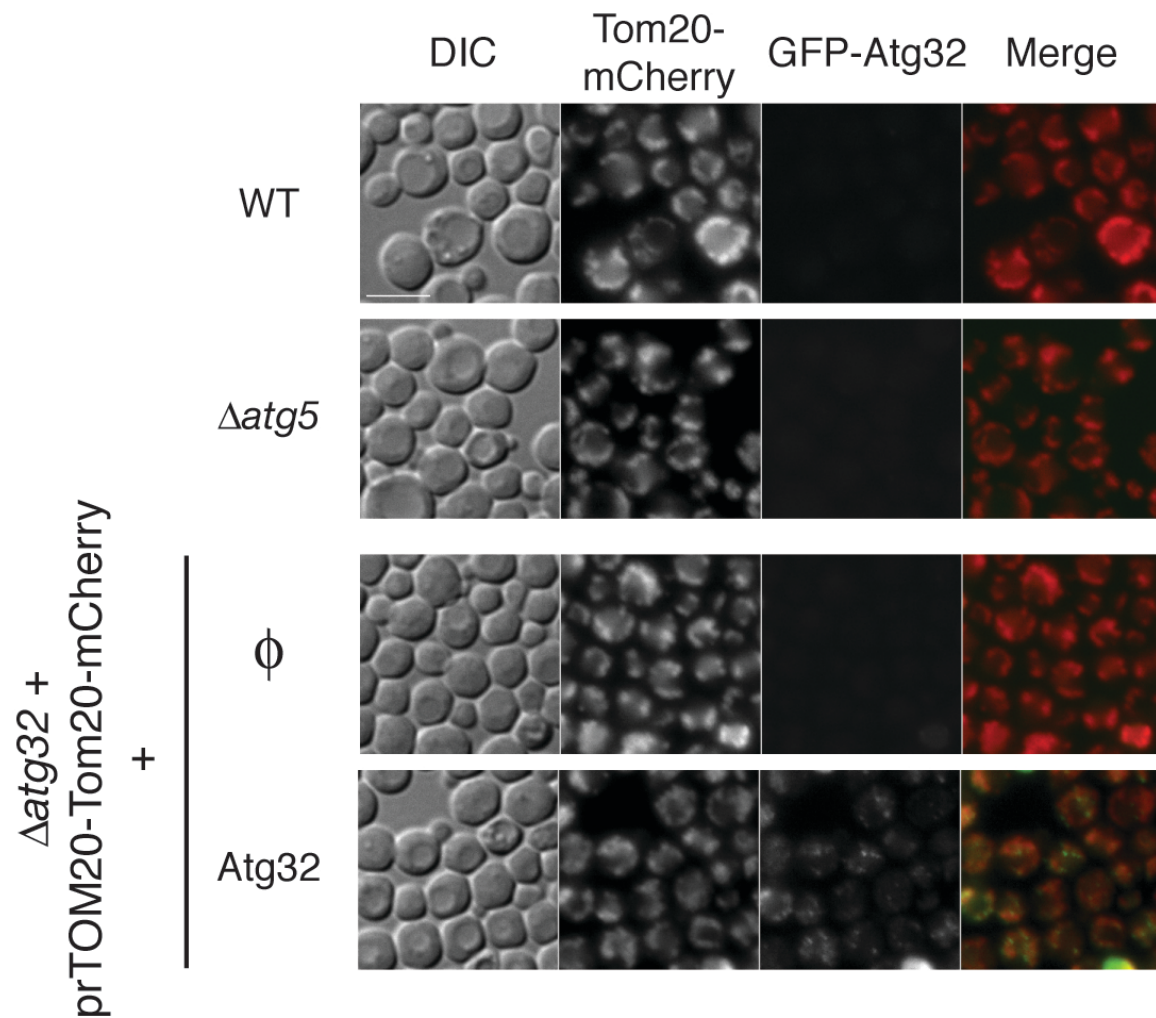

**Figure S5.** The *P. pastoris* Atg32 localizes on mitochondria. Cells grown in YPL medium for 12 h. The fusion protein, GFP-Atg32, colocalized with Tom20-mCherry at the mitochondria. prTOM represents the promoter of the *TOM20* gene. Scale bar: 5  $\mu$ m.

A

Phosphoserine site required  
for Atg11 binding

|                              |                                                                         |     |
|------------------------------|-------------------------------------------------------------------------|-----|
|                              | AIM                                                                     |     |
| Atg32                        | 116 FSVTAWQMVHRDDVKLQNLWTHTKMYGTGSRVPVGTGNGESVLSSEYEETDLP               | 169 |
| Atg32 <sup>W121A V124A</sup> | 116 FSVTA <del>QMA</del> HRDDVKLQNLWTHTKMYGTGSRVPVGTGNGESVLSSEYEETDLP   | 169 |
| Atg32 <sup>T119A</sup>       | 116 FSV <del>A</del> AWQMVHRDDVKLQNLWTHTKMYGTGSRVPVGTGNGESVLSSEYEETDLP  | 169 |
| Atg32 <sup>S159A</sup>       | 116 FSVTAWQMVHRDDVKLQNLWTHTKMYGTGSRVPVGTGNGESVLA <del>S</del> SEYEETDLP | 169 |
| Atg32 <sup>WQVLSSS</sup>     | 116 FSVTAWQ-----VLSSEYEETDLP                                            | 169 |

B

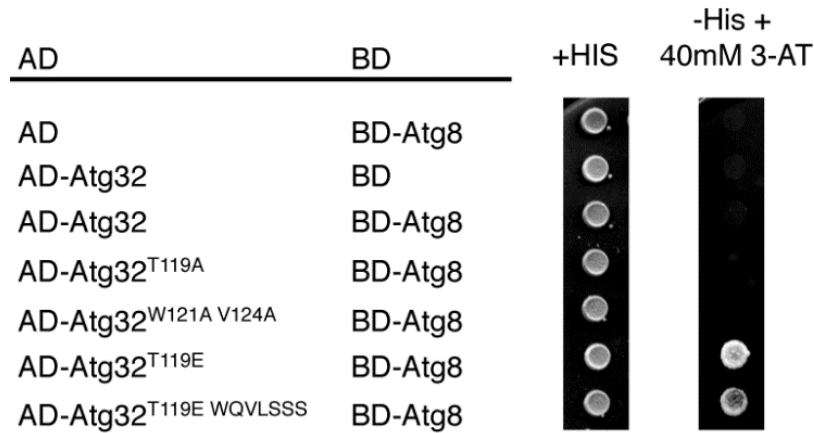

**Figure S6.** Interactions between *P. pastoris* Atg32 and Atg8. (A) Atg32 sequences from aa 116-169 of wild-type (Atg32), the T119A mutant, the AIM mutant (Atg32<sup>W121A V124A</sup>), the S159A mutant (Atg32<sup>S159A</sup>) affecting the Atg11 binding site and a deletion of the sequence between the AIM and phosphosite required for Atg11 binding in Atg32 (Atg32<sup>WQVLSSS</sup>). (B) Two-hybrid assays between Atg32 wild-type or mutants and Atg8. Phosphomimic T119E was included in Atg32<sup>WQVLSSS</sup> to detect the interaction with Atg8 because this site on the heterologous protein is not phosphorylated in *S. cerevisiae*.



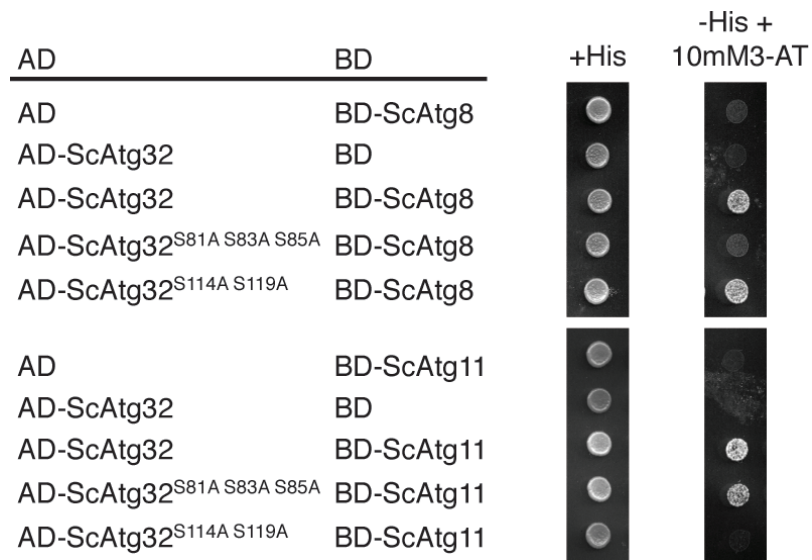

**Figure S7.** Two-hybrid protein-protein interaction analysis of ScAtg32, ScAtg8 and ScAtg11. The receptor was mutated at Serine(s) upstream of the AIM (ScAtg32<sup>S81A S83A S85A</sup>) and at the Atg11-binding site (ScAtg32<sup>S114A S119A</sup>).

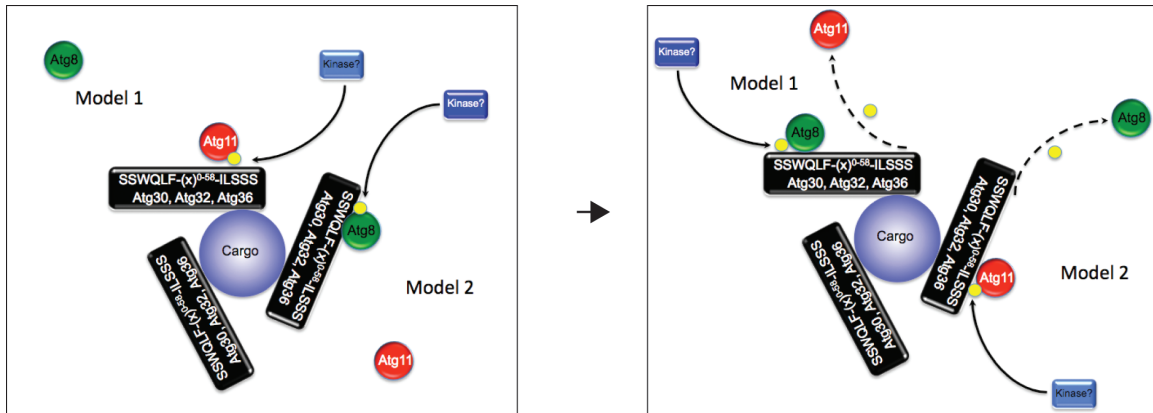

**Figure S8.** Model for interactions between autophagy receptors and the core autophagic machinery. See text for details.

## Tables

**Table S1. *Pichia pastoris* strains**

| Description                | Strain   | Genotype                                        | Reference  |
|----------------------------|----------|-------------------------------------------------|------------|
|                            | GS115    | <i>his4</i>                                     | [3]        |
| WT                         | PPY12    | <i>his4, arg4</i>                               | [4]        |
| $\Delta atg1$              | R12      | GS115 $\Delta atg1::Zeocin$                     | [5]        |
| $\Delta atg5$              | Sjcf935  | PPY12 $\Delta atg5::Zeocin$                     | This study |
| $\Delta atg8$              | Sjcf925  | PPY12 $\Delta atg8::KanMX$                      | [6]        |
| $\Delta atg11$             | R8       | GS115 $\Delta atg11::Zeocin$                    | [7]        |
| $\Delta atg30$             | Sjcf959  | PPY12 $\Delta atg30::KanMX$                     | This study |
| $\Delta atg30$             | Sjcf936  | PPY12 $\Delta atg30::Zeocin$                    | [6]        |
| $\Delta atg32$             | Sjcf1715 | PPY12 $\Delta atg32::KanMX$                     | This study |
| $\Delta ypt7$              | Srrm197  | PPY12 $\Delta ypt7::KanMX$                      | [8]        |
| $\Delta ypt7 \Delta atg30$ | Sjcf1736 | PPY12 $\Delta ypt7::KanMX \Delta atg30::Zeocin$ | This study |

**Table S2. *Saccharomyces cerevisiae* strains**

| Strain           | Description                   | Genotype                                                                                                                                                                                                       | Reference  |
|------------------|-------------------------------|----------------------------------------------------------------------------------------------------------------------------------------------------------------------------------------------------------------|------------|
| WT               | BY4742 + Thiolase-GFP         | MAT $\alpha$ , <i>his3<math>\Delta</math>1</i> , <i>leu2<math>\Delta</math>0</i> , <i>lys2<math>\Delta</math>0</i> , <i>ura3<math>\Delta</math>0</i> , <i>pot1::Thiolase-GFP (HIS5)</i>                        | [9]        |
| $\Delta Scatg1$  | $\Delta atg1$ + Thiolase-GFP  | MAT $\alpha$ , <i>his3<math>\Delta</math>1</i> , <i>leu2<math>\Delta</math>0</i> , <i>lys2<math>\Delta</math>0</i> , <i>ura3<math>\Delta</math>0</i> , <i>atg1::KanMX4</i> , <i>pot1::Thiolase-GFP (HIS5)</i>  | [9]        |
| $\Delta Scatg36$ | $\Delta atg36$ + Thiolase-GFP | MAT $\alpha$ , <i>his3<math>\Delta</math>1</i> , <i>leu2<math>\Delta</math>0</i> , <i>lys2<math>\Delta</math>0</i> , <i>ura3<math>\Delta</math>0</i> , <i>atg36::KanMX4</i> , <i>pot1::Thiolase-GFP (HIS5)</i> | This study |

**Table S3. *Pichia pastoris* plasmids**

| Plasmid | Promoter        | Fusion protein | Integration locus | Selectable marker         |
|---------|-----------------|----------------|-------------------|---------------------------|
| pJCF143 | <i>ATG30</i>    | Atg30-Flag     | <i>ATG30</i>      | Zeocin                    |
| pJCF208 | <i>ATG8</i>     | GFP-Atg8       | <i>HIS4</i>       | <i>HIS4</i>               |
| pJCF213 | <i>ATG30</i>    | Atg30-GFP      | <i>HIS4</i>       | <i>HIS4</i>               |
| pJCF291 | <i>ATG11</i>    | GFP-Atg11      | <i>ARG4</i>       | <i>ARG4</i>               |
| pJCF388 | <i>ATG11</i>    | Flag-Atg11     | <i>ARG4</i>       | <i>ARG4</i> or Zeocin     |
| pJCF392 | <i>GAPDH</i>    | GFP-Atg26      | <i>HIS4</i>       | <i>HIS4</i>               |
| pJCF401 | <i>GAPDH</i>    | BFP-SKL        | <i>HIS4</i>       | <i>HIS4</i> or Geneticin  |
| pJCF402 | <i>GAPDH</i>    | BFP-SKL        | <i>ARG4</i>       | <i>ARG4</i>               |
| pJCF419 | <i>ATG8</i>     | GFP-Atg8       | <i>HIS4</i>       | <i>HIS4</i> or Hygromycin |
| pJCF523 | <i>TOM20</i>    | Tom20-mCherry  | <i>ARG4</i>       | <i>ARG4</i> or Hygromycin |
| pJCF592 | <i>ATG32</i>    | Atg32-GFP      | <i>HIS4</i>       | <i>HIS4</i>               |
| pJCF648 | <i>ATG30</i>    | Atg30-HA       | <i>HIS4</i>       | <i>HIS4</i>               |
| pJCF681 | <i>ATG32</i>    | Atg32-HA       | <i>HIS4</i>       | <i>HIS4</i>               |
| pJCF688 | <i>TOM20</i>    | Tom20-GFP      | <i>ARG4</i>       | <i>ARG4</i> or Hygromycin |
| pJCF694 | <i>ATG8</i>     | myc-Atg8       | <i>HIS4</i>       | <i>HIS4</i> or Hygromycin |
| pJCF701 | <i>THIOLASE</i> | Thiolase-GFP   | <i>ARG4</i>       | <i>ARG4</i>               |

**Table S4. *Saccharomyces cerevisiae* plasmids**

| Plasmid      | Fusion protein 1 | Fusion Protein 2 | Background vector | Selectable marker |
|--------------|------------------|------------------|-------------------|-------------------|
| pJCF589-F115 | BD-PpAtg8        | none             | pGBT9             | <i>TRP1</i>       |
| pJCF226      | AD-PpAtg30       | none             | pGAD-GH           | <i>LEU2</i>       |
| pJCF590      | AD-PpAtg32       | none             | pGAD-GH           | <i>LEU2</i>       |
| pJCF659      | BD-ScAtg8        | none             | pGBT9             | <i>TRP1</i>       |
| pJCF660      | BD-ScAtg11       | none             | pGBT9             | <i>TRP1</i>       |
| pJCF652      | AD-ScAtg32       | none             | pGAD-GH           | <i>LEU2</i>       |
| pJCF653      | AD-ScAtg36       | none             | pGAD-GH           | <i>LEU2</i>       |
| pJCF800      | AD-ScAtg8        | none             | pGBT9             | <i>TRP1</i>       |
| pJCF801      | BD-ScAtg8        | NLS-ScAtg11      | pBridge           | <i>TRP1</i>       |
| pJCF804      | BD-ScAtg11       | NLS-ScAtg8       | pBridge           | <i>TRP1</i>       |
| pJCF805      | HA-ScAtg36       | none             | pRS415            | <i>LEU2</i>       |



## Methods

Media used to grow strains include: YPD (2% glucose, 2% bacto-peptone, 1% yeast extract); YNB (0.17% yeast nitrogen base without amino acids and ammonium sulfate, 0.5% ammonium sulfate); nitrogen starvation medium or SD-N (0.17% yeast nitrogen base without amino acids and ammonium sulfate; 2% glucose); oleate medium for *P. pastoris* (YNB; 0.079% complete supplement mixture [CSM], 0.05% yeast extract, 0.02% Tween-40, 0.2% oleate), oleate medium for *S. cerevisiae* (1% oleate, 5% Tween-40, 0.25% yeast extract, 0.5% peptone, and 5 mM phosphate buffer) and methanol medium (YNB; 0.079% CSM, 0.05% yeast extract, 0.5% methanol); YPL (2% lactic acid, 2% bacto-peptone, 1% yeast extract, pH 5.5). All cultures were grown at 30°C.

### *In silico* analysis

Atg30 and ScAtg32 protein sequences were used as queries in Standard Protein BLAST analyses on dataset of the non-redundant (nr) protein sequences, using default parameters and the algorithm PSI-BLAST (Position-Specific Iterated BLAST) at the National Center for Biotechnology Information (NCBI). The organism names, abbreviations and GenBank accession numbers of Atg30 homologs are the following: *Candida boidinii* (*Cb*, BAL15150), *Clavispora lusitaniae* (*Cl*, EEQ38313), *Spathaspora passalidarum* (*Sp*, EGW35335), *Candida tropicalis* (*Ct*, EER31772), *Millerozyma farinosa* (*Mf*, CCE81513), *Meyerozyma guilliermondii* (EDK37477), *Candida parapsilosis* (*Cp*, CCE40725), *Candida dubliniensis* (*Cd*, CAX44784), *Lodderomyces elongisporus* (*Le*, EDK43552), *Scheffersomyces stipitis* (*Ss*, EAZ63411), *Candida albicans* (*Ca*, EEQ42629), *Debaryomyces hansenii* (*Dh*, CAG86787), *Candida tenuis* (*Cte*, EGV64948) and *Hansenula polymorpha* (*Hp*, EFW95627). The Atg32 homologs: *Hansenula polymorpha* (EFW94927), *Pichia pastoris* (*Pp*, CAY71556), *Kluyveromyces lactis* (*Kl*, CAH02615), *Zygosaccharomyces rouxii* (*Zr*, CAR29352), *Ashbya gossypii* (*Ag*, AAS53654), *Candida glabrata* (*Cg*, CAG60013), *Vanderwaltozyma polyspora* (*Vp*, EDO18565), *Tetrapisispora phaffii* (*Tp*, CCE63093), *Lachancea thermotolerans* (*Lt*, CAR23100), *Torulaspora delbrueckii* (*Td*, CCE90351), *Kazachstania africana* (*Ka*, CCF57872), *Eremothecium cymbalariae* (*Ec*, AET39104), *Naumovozyma castellii* (*Nc*, CCC70913), *Scheffersomyces stipitis* (ABN68377), *Spathaspora passalidarum*

(EGW34613), *Candida tropicalis* (EER35239), *Debaryomyces hansenii* (CAG88355), *Millerozyma farinosa* (CCE81282) and *Clavispora lusitaniae* (EEQ41615). Multiple sequence alignments were done using ClustalW2 and manually adjusted if required. The sequence logo was obtained using the combined multiple sequence alignments of all Atg30 and Atg32 homologs in the GenBank database (up to Nov 2011, described the supplementary information) and the default setup of the WebLogo server (<http://weblogo.berkeley.edu/logo.cgi>).

### **Mobility shift detection of phosphorylated proteins**

One ml of  $\Delta ypt7 \Delta atg30$  cells expressing Atg30, Atg30<sup>S71A</sup> and Atg30<sup>S71E</sup> was collected after peroxisome proliferation in oleate medium for 15 h and shifted to nitrogen starvation for 30 min. and TCA precipitated. Samples were resolved in a 10% SDS-PAGE gel with 25  $\mu$ M Phos-Tag acrylamide (Wako Cat. #300-93523) and 25  $\mu$ M MnCl<sub>2</sub> to improve the separation of phosphoproteins. Phos-Tag acrylamide gels were treated according manufacturer's recommendation and analyzed by Western blot.

### **Co-immunoprecipitation with and without phosphatase treatment**

A) Peroxisomes purification: 300 hundred OD of cells were grown 15-16 h in oleate medium, washed twice with dH<sub>2</sub>O and transferred to glucose medium, SD-N at 2 OD/ml for 0.5 h. The pellet weight was used to determine the volume of Zymolase buffer (0.5 M KCl, 5 mM MOPS/KOH buffer [pH 7.2] 10 mM Na<sub>2</sub>SO<sub>4</sub>; 4 ml/g of cells) and concentration of Zymolase-100T (Nacalai Tesque) to add to cells (0.5 mg/1g cells). Cells were then incubated at 30°C (80 rpm for 45 min) and spheroplasts were centrifuged (2200 x g, 8 min, 4°C) before being resuspended in 1 homogenization buffer (5 mM MES/KOH [pH 5.5], 1 M Sorbitol with 10 mM NaF, 1 mM PMSF, 1 mM protease inhibitors: PIC yeast, Leupeptin and Aprotinin; 2 mL/g of cells) and subjected to 20 strokes in a Dounce homogenizer. The cell homogenate was centrifuged twice at low speed to remove cell debris (500 x g, 10 min, 4°C) and the supernatant spun at high speed (200,000 x g, 30 min, 4°C). The pellet was retrieved and resuspended in 0.8 mL of IP lysis buffer (50 mM Tris-HCl [pH 7.5], 100 mM NaCl, 0.1 mM EDTA, 0.2% Triton X-100, and 10 mM NaF, 1 mM PMSF, 1 mM protease inhibitors: PIC yeast, Leupeptin and

Aprotinin). The addition of 250  $\mu$ l acid-washed glass beads and vortexing (1 min x 5 times) lysed the peroxisome fraction, which was further solubilized with rotation (30 min, 4°C). The supernatant was recovered after centrifugation (20,000 x g, 10 min, 4°C) and total protein concentration was measured using the Bradford assay. The supernatant was diluted to 200  $\mu$ g of protein in 1 mL with IP lysis buffer; 10  $\mu$ l of sample was used for the input lane (Input).

B) Co-immunoprecipitation: 100  $\mu$ l of EZ-View HA-beads (Sigma) were added to the supernatant containing 200  $\mu$ g of protein in 1 ml and rotated for 16 hr, 4°C. The samples were either washed four times with IP lysis buffer (5 mL for 10 min) or were further phosphatase treated. HA-Beads after the wash were resuspended in 100  $\mu$ L of 1% SDS and 1x loading buffer and boiled at 100°C for 10 min to elute, followed by SDS-PAGE and immunoblotting.

C) Lambda Protein Phosphatase ( $\lambda$ PP) treatment: the protein complex purified using EZ-View HA-beads from  $\Delta atg30$  cells, with or without Atg30-HA expression, was collected in duplicate and washed once with 5 ml of IP lysis buffer and twice with 500  $\mu$ l of NEBuffer for PMP (50 mM HEPES, 100 mM NaCl, 2 mM DTT, 0.01% Brij 35, pH 7.5). The HA-bead complex was resuspended in 50  $\mu$ l of NEBuffer for PMP with 1.5  $\mu$ l of  $\lambda$ PP (+; NEB, 400,000 U/ml) and without  $\lambda$ PP (-), and incubated at 30°C for 1 h. To stop the reaction and clean the HA-bead complex, two 5 ml short washes with IP lysis buffer, as well as two 5 ml washes for 10 min with IP lysis buffer were used. Finally, samples were eluted with 100  $\mu$ l of 1% SDS and 1x loading buffer, boiled and subjected to SDS-PAGE and immunoblotting.

### **Proteins purification and sequencing**

A) Proteins purification: HA-tagged Atg30, mutated at position 81 (A81R) to reduce the size of the tryptic peptide encompassing S71 (from 33 to 20 aa), was expressed in  $\Delta atg30$  cells. Cells were grown overnight on oleate medium and transferred for 30 min into SD-N before extraction. Atg30-HA purification was performed from 3000 OD equivalents of yeast cells. The cells pellet was washed in phosphate-buffered saline (pH 7.4) and lysed with 5 mL of glass beads (vortexed 5 times for 2 min at 4°C) in 20 ml IP lysis buffer (50

mM Tris-HCl, pH 7.5, 100mM NaCl, 0.1mM EDTA, 0.2% Triton X-100, 10 mM NaF, 1mM PMSF, 1mM protease inhibitors cocktail: PIC yeast, Leupeptin and Aprotinin). The cells debris was removed by centrifugation at low speed ( $500 \times g$ , 10 min). The membrane protein solubilization was performed by incubation of the supernatant at 4°C for 1 h with rotation followed by centrifugation ( $21,000 \times g$ , 10 min). One mL of EZ-View HA-beads (Sigma) was added to the supernatant and incubated overnight. Beads were washed five times with 10 mL of the IP lysis buffer for 5 min and three times with 5 mL of 50 mM HEPES pH 7.2.

B) Mass spectrometry: proteins bound to EZ-View HA-beads were digested with 0.5  $\mu\text{g}$  trypsin at 37°C overnight. Phosphopeptides were enriched by metal oxide affinity capture (CeO<sub>2</sub>) and analyzed by 2D LC MS/MS using an LTQ tandem mass spectrometer.

An Agilent 1200 HPLC system (Agilent Technologies) delivered a flow rate of 600 nL min<sup>-1</sup> to a 3-phase capillary chromatography column through a splitter. Using a custom pressure cell, 5  $\mu\text{m}$  Zorbax SB-C18 (Agilent) was packed into fused silica capillary tubing (250  $\mu\text{m}$  ID, 360  $\mu\text{m}$  OD, 30 cm long) to form the first dimension reverse phase column (RP1). A 5 cm long strong cation exchange (SCX) column packed with 5  $\mu\text{m}$  PolySulfoethyl (PolyLC) was connected to RP1 using a zero dead volume 1  $\mu\text{m}$  filter (Upchurch, M548) attached to the exit of the RP1 column. A fused silica capillary (200  $\mu\text{m}$  ID, 360  $\mu\text{m}$  OD, 20 cm long) packed with 5  $\mu\text{m}$  Zorbax SB-C18 (Agilent) was connected to SCX as the analytical column (RP2). The electrospray tip of the fused silica tubing was pulled to a sharp tip using a laser puller (Sutter P-2000). The peptide mixtures were loaded onto the RP1 column using the custom pressure cell. Peptides were first eluted from the RP1 column to the SCX column using a 0 to 80% acetonitrile gradient for 150 min. The peptides were then fractionated by the SCX column using a series of salt gradients (from 5 mM to 1 M ammonium acetate for 20 min), followed by high resolution reverse phase separation using an acetonitrile gradient of 0 to 80% for 120 min.

Spectra were acquired on LTQ-XL linear ion trap tandem mass spectrometers (Thermo Electron Corporation, San Jose, CA) employing automated, data dependent acquisition. The mass spectrometer was operated in positive ion mode with a source temperature of 250 °C. As a final fractionation step, gas phase separation in the ion trap was employed to separate the peptides into 3 mass classes prior to scanning; the full MS scan range was



divided into 3 smaller scan ranges (400–800, 800–1,200, and 1,200–2,000 Da) to improve dynamic range. Each MS scan was followed by 5 MS/MS scans of the most intense ions from the parent MS scan. A dynamic exclusion of 1 min was used to improve the duty cycle.

The raw data were extracted and searched using Spectrum Mill v4.01 (Agilent Technologies). MS/MS spectra with a sequence tag length of 1 or less were considered to be poor spectra and were discarded. The remaining MS/MS spectra were searched against NCBI non-redundant protein database limited to *P. pastoris* taxonomy. The enzyme parameter was limited to full tryptic peptides with a maximum mis-cleavage of 1. All other search parameters were set to SpectrumMill's default settings (carbamidomethylation of cysteines, +/- 2.5 Da for precursor ions, +/- 0.7 Da for fragment ions, and a minimum matched peak intensity of 50%). Ox-Met, n-term pyro-Gln, and phosphorylation on Serine, Threonine, or Tyrosine were defined as variable modifications. A maximum of 2 modifications per peptide was used. Spectra with score of 10 or higher were manually inspected. Phosphorylation sites were localized to a particular amino acid within a peptide using the variable modification localization (VML) score in Agilent's Spectrum Mill software [1].

## References

1. Chalkley RJ, Clauser KR (2012) Modification site localization scoring: strategies and performance. *Mol Cell Proteomics* **11**: 3-14
2. Oku M, Warnecke D, Noda T, Muller F, Heinz E, Mukaiyama H, Kato N, Sakai Y (2003) Peroxisome degradation requires catalytically active sterol glucosyltransferase with a GRAM domain. *EMBO J* **22**: 3231-3241
3. Cregg JM, Barringer KJ, Hessler AY, Madden KR (1985) *Pichia pastoris* as a host system for transformations. *Mol Cell Biol* **5**: 3376-3385
4. Gould SJ, McCollum D, Spong AP, Heyman JA, Subramani S (1992) Development of the yeast *Pichia pastoris* as a model organism for a genetic and molecular analysis of peroxisome assembly. *Yeast* **8**: 613-628

5. Stromhaug PE, Bevan A, Dunn WA, Jr. (2001) GSA11 encodes a unique 208-kDa protein required for pexophagy and autophagy in *Pichia pastoris*. *J Biol Chem* **276**: 42422-42435
6. Nazarko TY, Farre JC, Subramani S (2009) Peroxisome size provides insights into the function of autophagy-related proteins. *Mol Biol Cell* **20**: 3828-3839
7. Kim J *et al* (2001) Cvt9/Gsa9 functions in sequestering selective cytosolic cargo destined for the vacuole. *J Cell Biol* **153**: 381-396
8. Manjithaya R, Anjard C, Loomis WF, Subramani S (2010) Unconventional secretion of *Pichia pastoris* Acb1 is dependent on GRASP protein, peroxisomal functions, and autophagosome formation. *J Cell Biol* **188**: 537-546
9. Saleem RA, Knoblach B, Mast FD, Smith JJ, Boyle J, Dobson CM, Long-O'Donnell R, Rachubinski RA, Aitchison JD (2008) Genome-wide analysis of signaling networks regulating fatty acid-induced gene expression and organelle biogenesis. *J Cell Biol* **181**: 281-292
