# Supplementary material
Source: PubMed Central journal article supplement (PMC3642380)
Supplement: embor201340s2.pdf [file embor201340s2.pdf]

Manuscript EMBOR-2012-36514

## **Phosphorylation of mitophagy and pexophagy receptors coordinates their interaction with Atg8 and Atg11**

Jean-Claude Farre, Aaron Burkenroad, Sarah F. Burnett and Suresh Subramani

*Corresponding author: Suresh Subramani, Univ. of California at San Diego*

---

### **Review timeline:**

Submission date:  
Accepted:

17 August 2012  
12 March 2013

---

### **Transaction Report:**

No Peer Review Process File is available with this article, as the authors have chosen not to make the review process public in this case.
